# Supplementary material for: Breast asymmetry and predisposition to breast cancer
Source: Springer Nature journal article supplement (doi:10.1186/bcr1388), 2006-03-20
Supplement: 13058_2005_1362_MOESM1_ESM.pdf [file 13058_2005_1362_MOESM1_ESM.pdf]

**Table 2. Conditional logistic regression analyses with presence or absence of cancer as the dependent variable, for both absolute\* and relative<sup>+</sup> breast FA (N=504)**

| <b>Risk factor</b>              | <b>Crude relative odds</b> | <b>(95% CI)</b> | <b>p-value</b> | <b>Adjusted relative odds*</b> | <b>(95% CI)</b> | <b>p-value</b> | <b>Adjusted relative odds<sup>+</sup></b> | <b>(95% CI)</b> | <b>p-value</b> |
|---------------------------------|----------------------------|-----------------|----------------|--------------------------------|-----------------|----------------|-------------------------------------------|-----------------|----------------|
| Absolute breast FA (ml)         | 1.003                      | (1.000, 1.005)  | 0.039          | 1.004                          | (1.001, 1.007)  | 0.010          | -                                         | -               | -              |
| Relative breast FA              | 1.007                      | (0.999, 1.014)  | 0.070          | -                              | -               | -              | 1.009                                     | (1.001, 1.017)  | 0.032          |
| BMI                             | 0.999                      | (0.945, 1.057)  | 0.978          | 0.998                          | (0.914, 1.090)  | 0.966          | 1.001                                     | (0.917, 1.093)  | 0.982          |
| Height (cm)                     | 1.056                      | (1.025, 1.087)  | <0.001         | 1.056                          | (1.021, 1.092)  | 0.001          | 1.053                                     | (1.019, 1.088)  | 0.002          |
| Age at menarche (years)         | 0.808                      | (0.723, 0.902)  | <0.001         | 0.781                          | (0.688, 0.886)  | <0.001         | 0.781                                     | (0.688, 0.886)  | <0.001         |
| Number of pregnancies           | 0.937                      | (0.842, 1.042)  | 0.229          | 1.044                          | (0.923, 1.180)  | 0.493          | 1.040                                     | (0.921, 1.176)  | 0.524          |
| Family history                  | 2.003                      | (1.368, 2.935)  | <0.001         | 2.082                          | (1.354, 3.201)  | 0.001          | 2.097                                     | (1.361, 3.231)  | 0.001          |
| Mean breast volume (ml)         | 1.000                      | (0.999, 1.001)  | 0.824          | 0.999                          | (0.999, 1.000)  | 0.326          | 1.000                                     | (0.999, 1.001)  | 0.939          |
| Parenchyma type (right breast): |                            |                 |                |                                |                 |                |                                           |                 |                |
| N1                              | 1.0                        | -               | -              | 1.0                            | -               | -              | 1.0                                       | -               | -              |
| P1                              | 3.253                      | (1.622, 6.524)  | 0.001          | 3.228                          | (1.508, 6.910)  | 0.003          | 3.297                                     | (1.543, 7.046)  | 0.002          |
| P2                              | 4.269                      | (2.230, 8.173)  | <0.001         | 3.605                          | (1.726, 7.531)  | 0.001          | 3.747                                     | (1.795, 7.822)  | <0.001         |
| DY                              | 2.694                      | (1.513, 4.794)  | 0.001          | 2.944                          | (1.484, 5.841)  | 0.002          | 3.019                                     | (1.523, 5.986)  | 0.002          |
| Menopausal status:              |                            |                 |                |                                |                 |                |                                           |                 |                |
| Pre                             | 1.0                        | -               | -              | 1.0                            | -               | -              | 1.0                                       | -               | -              |
| Peri                            | 0.490                      | (0.264, 0.907)  | 0.023          | 0.446                          | (0.229, 0.867)  | 0.017          | 0.461                                     | (0.238, 0.892)  | 0.022          |
| Post                            | 0.286                      | (0.135, 0.608)  | 0.001          | 0.368                          | (0.162, 0.834)  | 0.017          | 0.376                                     | (0.166, 0.848)  | 0.018          |
| Age at menopause** (years)      | 1.158                      | (1.057, 1.270)  | 0.002          | 1.181                          | (1.063, 1.312)  | 0.002          | 1.174                                     | (1.058, 1.302)  | 0.002          |

\*\*for subgroup of post-menopausal women. When age at menopause is included in the model BMI, height, number of pregnancies and parenchyma types P1 and P2 become insignificant, and mean breast volume and parenchyma type DY have borderline significance. Absolute breast FA and relative breast FA remain significant effects.

Absolute breast FA = unsigned values (L-R) of breast volume.

Relative breast FA = L-R breast volume / [L+R breast volume] 0.5

•
