# Supplementary material for: Breast asymmetry and predisposition to breast cancer
Source: Springer Nature journal article supplement (doi:10.1186/bcr1388), 2006-03-20
Supplement: 13058_2005_1362_MOESM3_ESM.pdf [file 13058_2005_1362_MOESM3_ESM.pdf]

**Table 2. Conditional logistic regression results with presence or absence of cancer as the dependent variable, for both absolute and relative breast FA**

| <b>variable</b>                     | <b>B</b> | <b>SE</b> | <b>p</b> |
|-------------------------------------|----------|-----------|----------|
| <i>1. absolute breast asymmetry</i> | 0.0044   | 0.0015    | 0.0037   |
| age at menarche                     | 0.2319   | 0.0583    | 0.0001   |
| family history                      | 0.8241   | 0.2133    | 0.0001   |
| parenchyma type                     | 0.2693   | 0.0913    | 0.0034   |
| <i>2. relative breast asymmetry</i> | 2.3460   | 0.9321    | 0.0118   |
| age at menarche                     | 0.2386   | 0.0580    | 0.0001   |
| family history                      | 0.8263   | 0.2133    | 0.0001   |
| parenchyma type                     | 0.2895   | 0.0881    | 0.001    |
| weight                              | 0.0217   | 0.0107    | 0.0426   |

Non-significant variables removed by the Wald (backward) method when absolute asymmetry was included were age, mean breast volume, number of offspring and weight. When relative asymmetry was included as an independent variable, the above were removed with the exception of weight, which remained significant.
